# Supplementary material for: Curdepsidone A Induces Intrinsic Apoptosis and Inhibits Protective Autophagy via the ROS/PI3K/AKT Signaling Pathway in HeLa Cells
Source: MDPI journal article supplement (doi:10.3390/md22050227), 2024-05-17
Supplement: s1 [file s1]

## Supplementary Materials

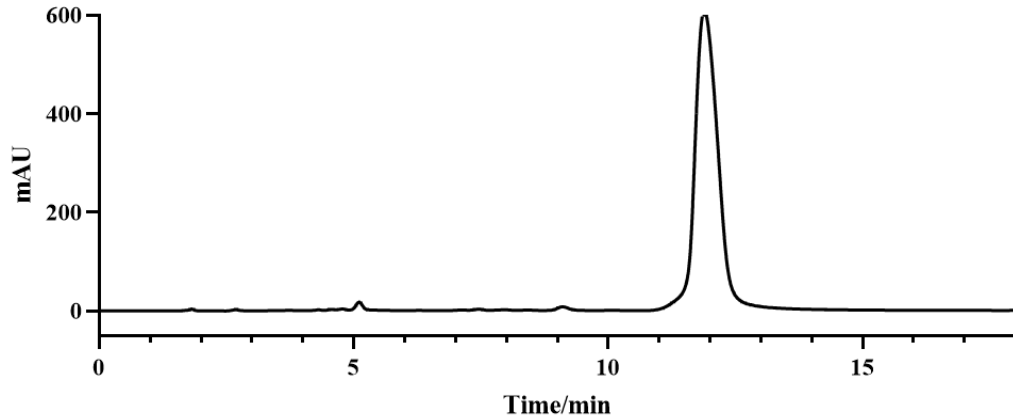

**Figure S1.** The purity of curdepsidone A.

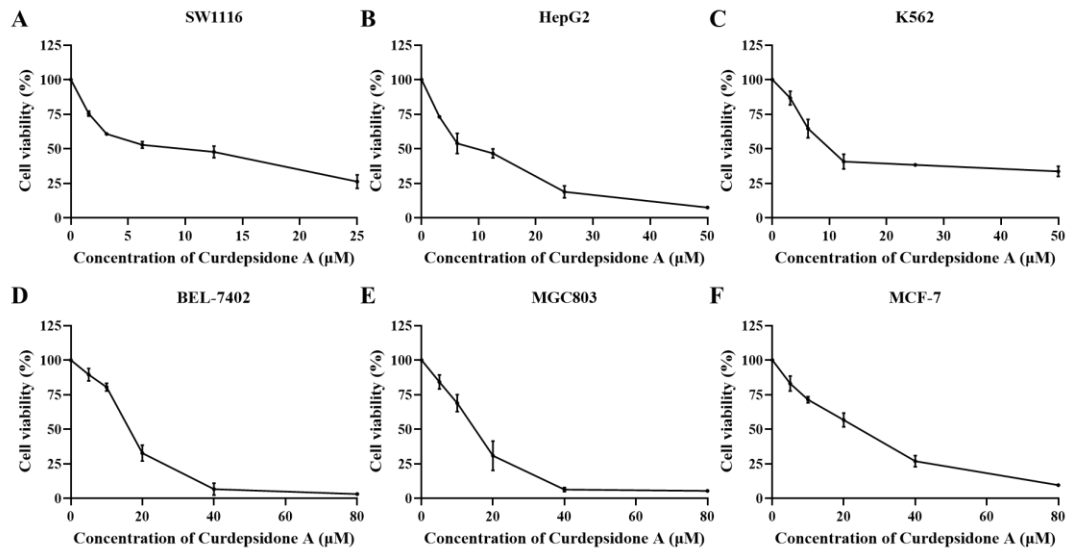

**Figure S2.** The viability of different tumor cells. (A-F) SW1116 (A), HepG2 (B), K562 (C), BEL-7402 (D), MGC803 (E), and MCF-7 (F) cells were exposed to various concentrations of curdepsidone A for 48 h. Cell viability was analyzed by MTT assay. Values are mean  $\pm$  SD,  $n = 3$ ,  $*P < 0.05$ .  $**P < 0.01$ .

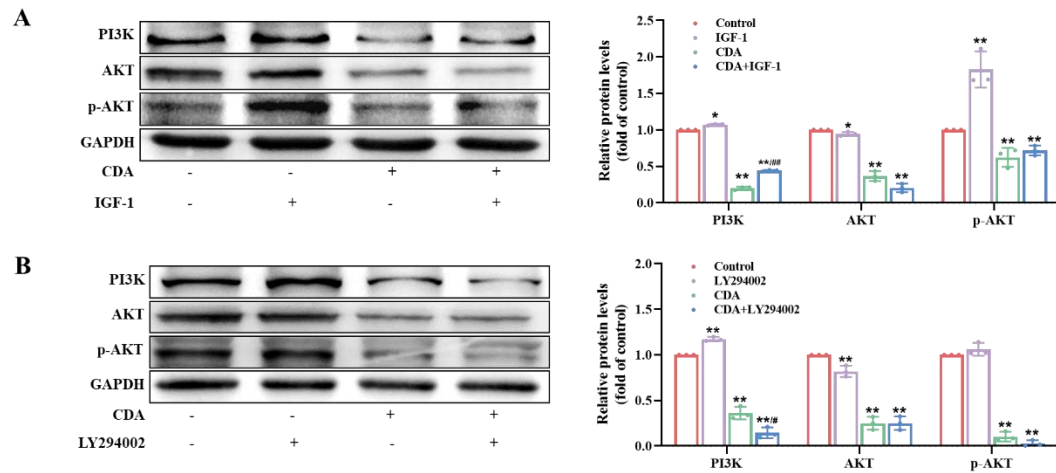

**Figure S3.** The effect of IGF-1 and LY294002 on curdepsidone A-induced inhibition of PI3K/AKT pathway. (A-B) Hela cells were pretreated with IGF-1 (200 ng/mL) (A) or LY294002 (5  $\mu$ M) (B) and then treated with curdepsidone A (10  $\mu$ M) for 48 h. The expression levels of PI3K, AKT, and p-AKT were examined. Values are mean  $\pm$  SD,  $n = 3$ , \* $P < 0.05$ , \*\* $P < 0.01$  versus control group; # $P < 0.05$ , ## $P < 0.01$  versus CDA group.

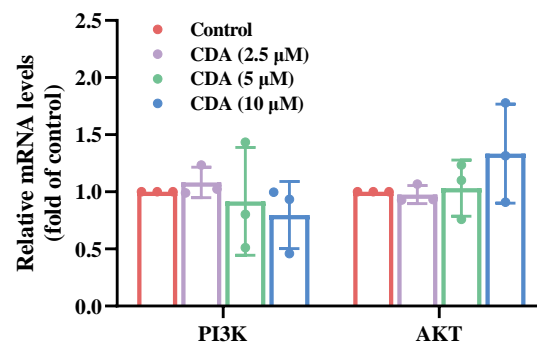

**Figure S4.** The mRNA levels of PI3K and AKT. Hela cells were exposed to 2.5, 5, and 10  $\mu$ M curdepsidone A for 48 h. The mRNA levels of PI3K and AKT were examined by qPCR.

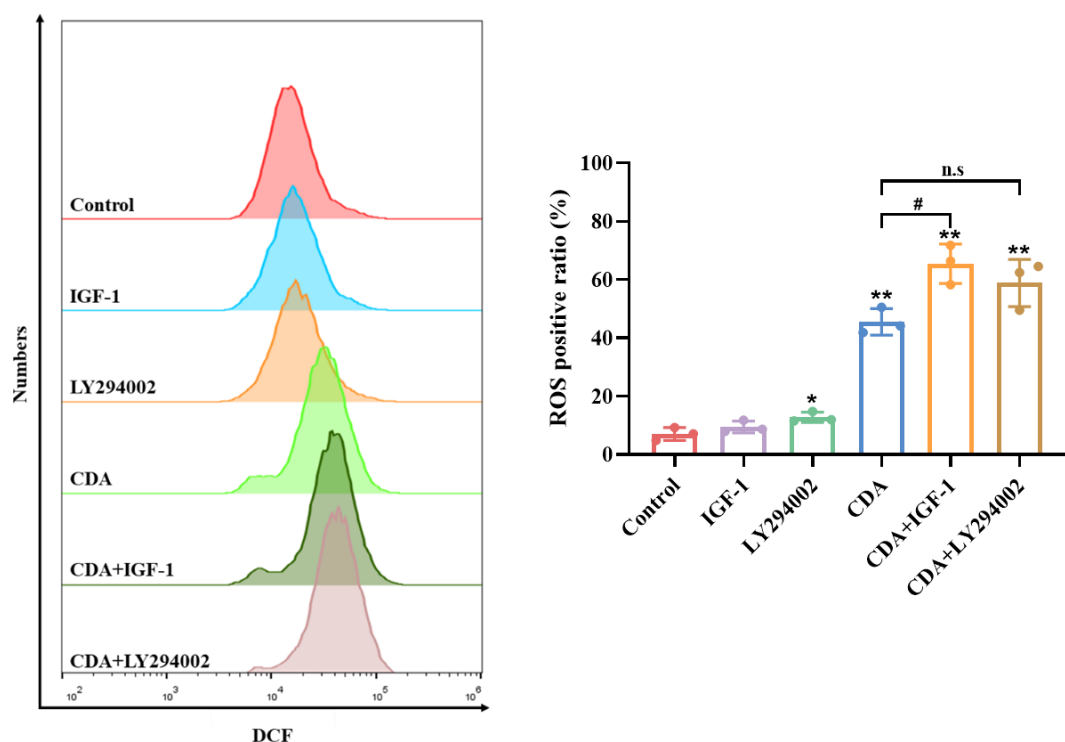

**Figure S5.** The effect of IGF-1 and LY294002 on curdepsidone A-induced upregulation of ROS levels. Hela cells were pretreated with IGF-1 (200 ng/mL) (A) or LY294002 (5  $\mu$ M) (B) and then treated with curdepsidone A (10  $\mu$ M) for 24 h. Intracellular ROS levels were assessed by flow cytometry.

**Table S1.** Primers used in this study.

| Primer  | Sequence (5'-3')     |
|---------|----------------------|
| AKT-F   | AAGCACCGCGTGACCATGAA |
| AKT-R   | GGCCTGTGGCCTTCTCCTTC |
| PI3K-F  | CGGTTCCGCCAGTGTTGTGA |
| PI3K-R  | GCCCTGCAGTCAACATCAGC |
| GAPDH-F | GCGGGGCTCTCCAGAACATC |
| GAPDH-R | TCCACCACTGACACGTTGGC |
